# Supplementary material for: The radiation- and chemo-sensitizing capacity of diclofenac can be predicted by a decreased lactate metabolism and stress response
Source: Springer Nature journal article supplement (doi:10.1186/s13014-024-02399-5), 2024-01-16

Figure 1 E: LS174T

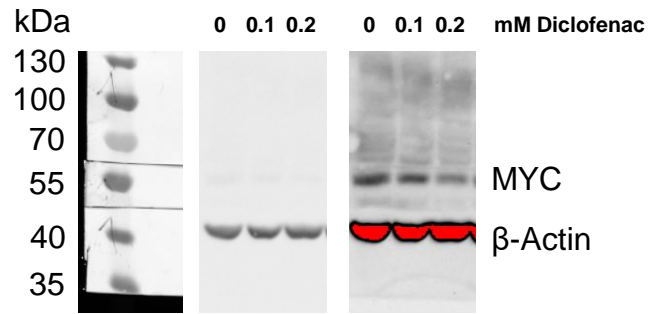

Figure 1 F: LoVo

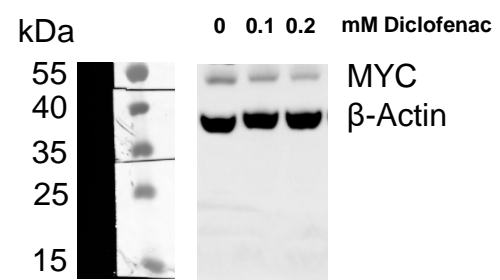

Figure 1 G: A549

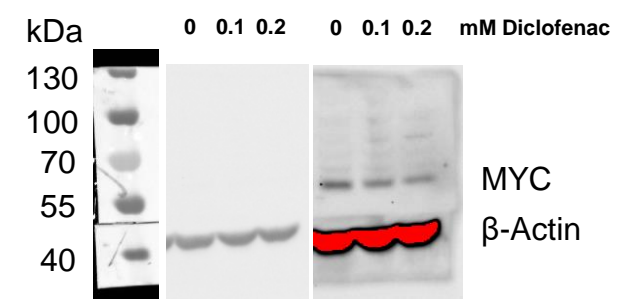

Figure 2 B: LS174T

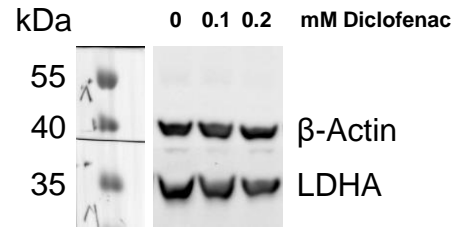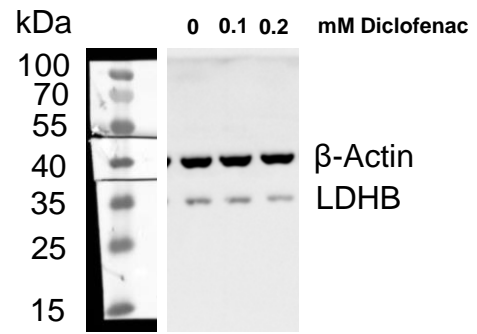

Figure 2 D: LoVo

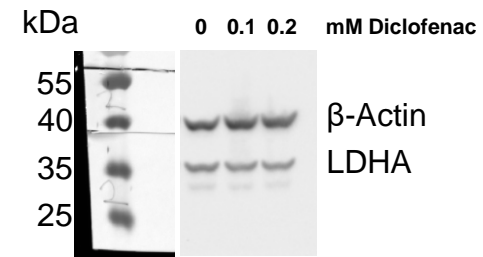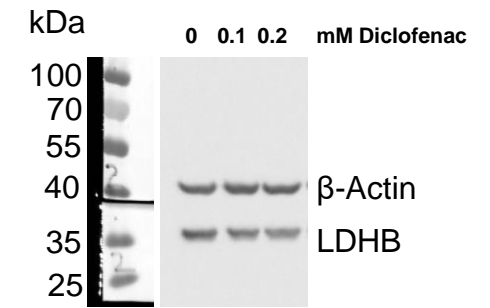

Figure 2 F: A549

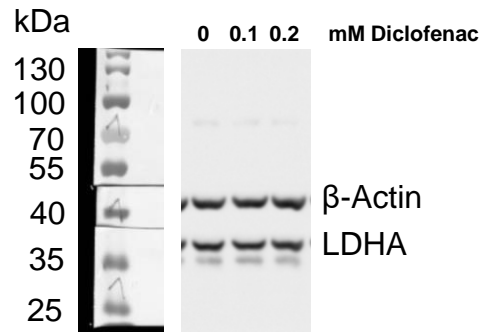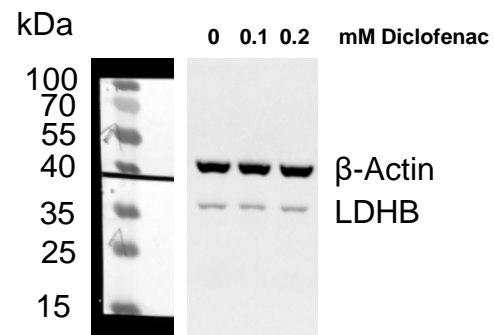

Figure 2 H: MDA-MB-231

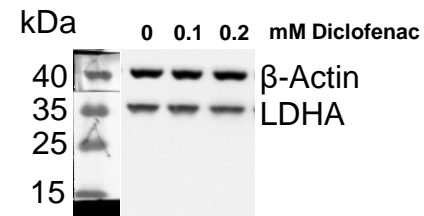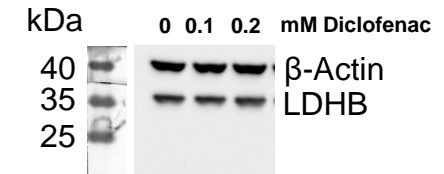

Figure 3 A: LS174T

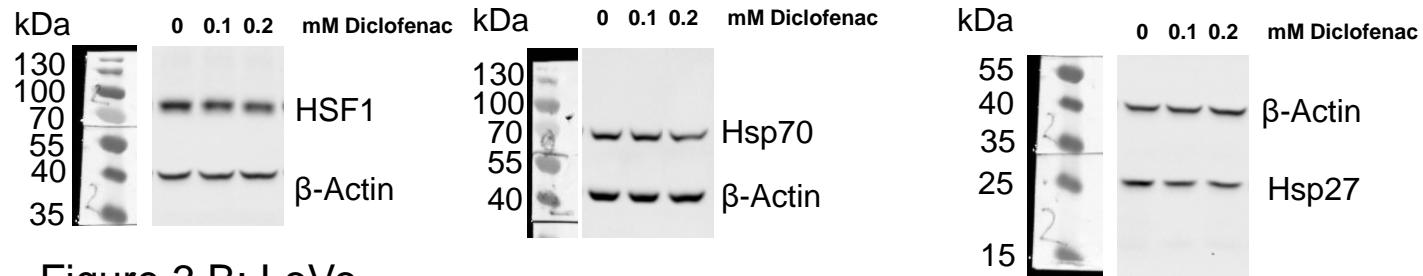

Figure 3 B: LoVo

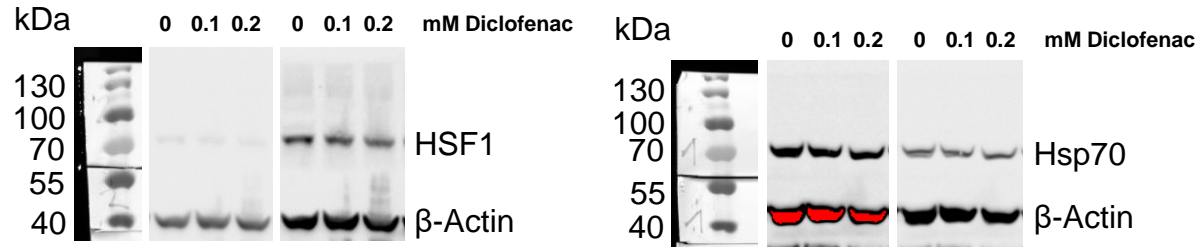

Figure 3 C: A549

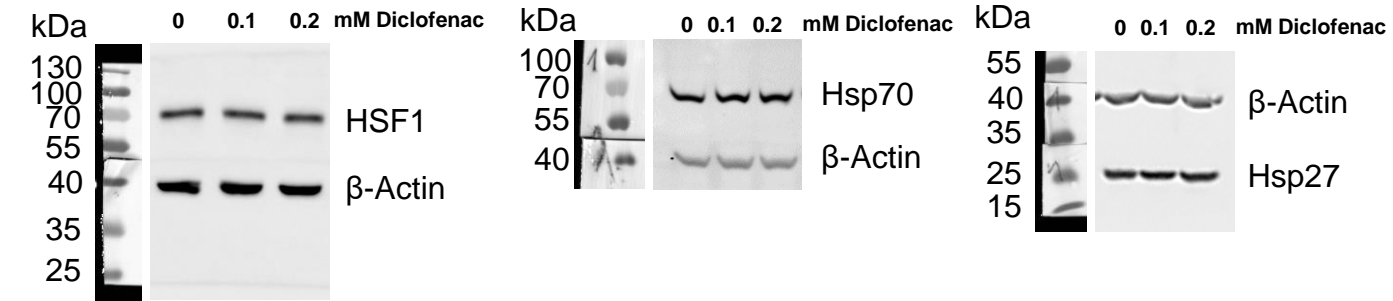

Figure 3 D: MDA-MB-231

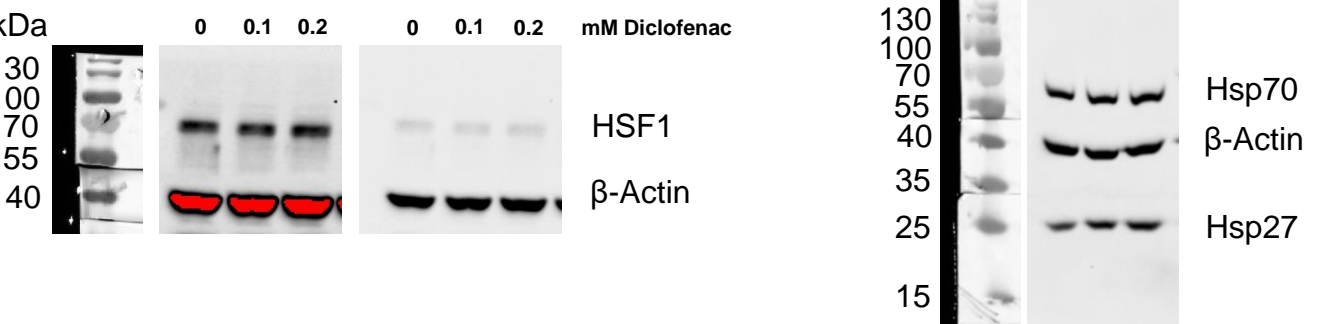

Figure S2 B: COLO-357

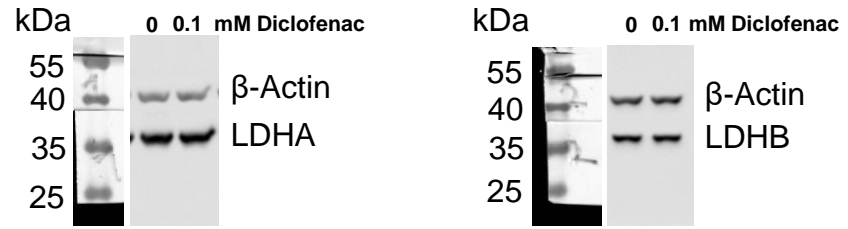

Figure S3: COLO-357

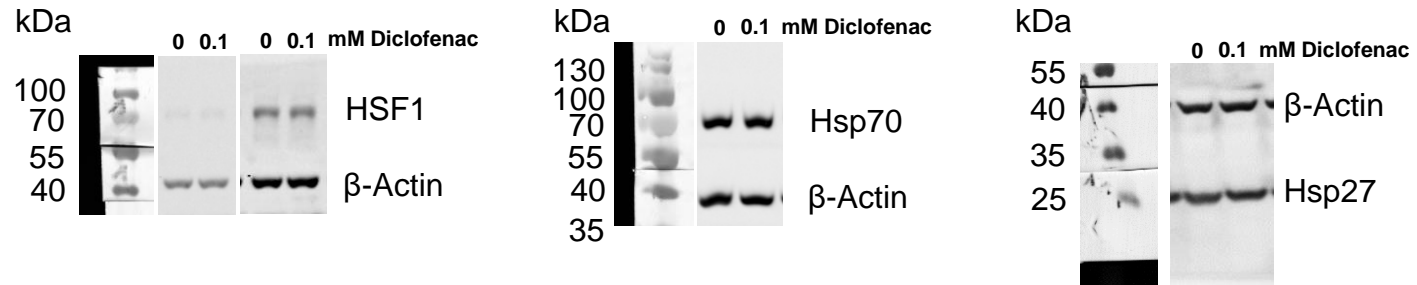

Supplement: MOESM2 [file 26632234]
